# Supplementary material
Source: publisher site journal article supplement (https://www.dovepress.com/article/483242)
Supplement: Supplementary file 1 [file get_supplementary_file.php]

**Table S1 Clinical and pathological characteristics of males and females**

| Variable | Males | | | | | Females | | | |
| --- | --- | --- | --- | --- | --- | --- | --- | --- | --- |
| PLR≤169.4 | PLR＞169.4 | Total | P |  | PLR≤169.4 | PLR＞169.4 | Total | P |
| Age |  |  |  | 0.547 |  |  |  |  | 0.410 |
| ＜70 years | 60(65.9) | 13(59.1) | 73(64.6) |  |  | 46(55.4) | 14(46.7) | 60(53.1) |  |
| ≥70 years | 31(34.1) | 9(40.9) | 40(35.4) |  |  | 37(44.6) | 16(53.3) | 53(46.9) |  |
| Pathologic T stage |  |  |  | 0.097 |  |  |  |  | 0.586 |
| pTa/pTis | 19(20.9) | 3(13.6) | 22(19.5) |  |  | 14(16.9) | 6(20.0) | 20(17.7) |  |
| pT1 | 18(19.8) | 3(13.6) | 21(18.6) |  |  | 17(20.5) | 7(23.3) | 24(21.2) |  |
| pT2 | 19(20.9) | 1(4.5) | 20(17.7) |  |  | 22(26.5) | 5(16.7) | 27(23.9) |  |
| pT3 | 29(31.9) | 11(50.0) | 40(35.4) |  |  | 27(32.5) | 9(30.0) | 36(31.9) |  |
| pT4 | 6(6.6) | 4(18.2) | 10(8.8) |  |  | 3(3.6) | 3(10.0) | 6(5.3) |  |
| Pathologic N stage |  |  |  | 0.005* |  |  |  |  | 0.813 |
| pN0 | 90(98.9) | 18(81.8) | 108(95.6) |  |  | 77(92.8) | 29(96.7) | 106(93.8) |  |
| pN1 | 0(0.0) | 1(0.9) | 1(0.9) |  |  | 3(3.6) | 0(0.0) | 3(2.7) |  |
| pN2 | 1(1.1) | 3(13.6) | 4(3.5) |  |  | 3(3.6) | 1(3.3) | 4(3.5) |  |
| Location |  |  |  | 0.725 |  |  |  |  | 0.139 |
| Left | 50(54.9) | 13(59.1) | 63(55.8) |  |  | 34(41.0) | 17(56.7) | 51(45.1) |  |
| Right | 41(45.1) | 9(40.9) | 50(44.2) |  |  | 49(59.0) | 13(43.3) | 62(54.9) |  |
| Hypertension |  |  |  | 0.953 |  |  |  |  | 0.610 |
| No | 49(53.8) | 12(54.5) | 61(54.0) |  |  | 37(44.6) | 15(50.0) | 52(46.0) |  |
| Yes | 42(46.2) | 10(45.5) | 52(46.0) |  |  | 46(55.4) | 15(50.0) | 61(54.0) |  |
| Diabetes |  |  |  | 1.000 |  |  |  |  | 0.811 |
| No | 71(78.0) | 18(81.8) | 89(78.8) |  |  | 60(72.3) | 21(70.0) | 81(71.7) |  |
| Yes | 20(22.0) | 4(18.2) | 24(21.2) |  |  | 23(27.7) | 9(30.0) | 32(28.3) |  |
| BMI |  |  |  | 0.041* |  |  |  |  | 0.118 |
| ＜24 kg/m2 | 40(44.0) | 15(68.2) | 55(48.7) |  |  | 36(43.4) | 18(60.0) | 54(47.8) |  |
| ≥24 kg/m2 | 51(56.0) | 7(31.8) | 58(51.3) |  |  | 47(56.6) | 12(40.0) | 59(52.2) |  |
| Uropathology |  |  |  | 0.133 |  |  |  |  | 0.994 |
| None | 45(49.5) | 16(72.7) | 61(54.0) |  |  | 45(54.2) | 16(53.3) | 61(54.0) |  |
| Existence | 18(19.8) | 3(13.6) | 21(13.6) |  |  | 14(16.9) | 5(16.7) | 19(16.8) |  |
| Heterocyst | 28(30.8) | 3(13.6) | 31(27.4) |  |  | 24(28.9) | 9(30.0) | 33(29.2) |  |
| Hydronephrosis |  |  |  | 0.195 |  |  |  |  | 0.526 |
| No | 57(62.6) | 17(77.3) | 74(65.5) |  |  | 63(75.9) | 21(70.0) | 84(74.3) |  |
| Yes | 34(37.4) | 5(22.7) | 39(34.5) |  |  | 20(24.1) | 9(30.0) | 29(25.7) |  |
| Tumor origin |  |  |  | 0.599 |  |  |  |  | 0.380 |
| Pelvis | 44(48.4) | 8(36.4) | 52(46.0) |  |  | 41(49.4) | 18(60.0) | 59(52.2) |  |
| Ureter | 37(40.7) | 11(50.0) | 48(42.5) |  |  | 33(39.8) | 11(36.7) | 44(38.9) |  |
| Junction | 10(11.0) | 3(13.6) | 13(11.5) |  |  | 9(10.8) | 1(3.3) | 10(8.8) |  |
| Multifocality |  |  |  | 0.484 |  |  |  |  | 0.721 |
| Single | 53(58.2) | 11(50.0) | 64(56.6) |  |  | 58(69.9) | 22(73.3) | 80(70.8) |  |
| Multiple | 38(41.8) | 11(50.0) | 49(43.4) |  |  | 25(30.1) | 8(26.7) | 33(29.2) |  |
| Tumor grade |  |  |  | 0.627 |  |  |  |  | 0.933 |
| Low | 34(37.4) | 7(31.8) | 41(36.3) |  |  | 20(24.1) | 7(23.3) | 27(23.9) |  |
| High | 57(62.6) | 15(68.2) | 72(63.7) |  |  | 63(75.9) | 23(76.7) | 86(76.1) |  |
| Invasive |  |  |  | 0.424 |  |  |  |  | 0.431 |
| No | 24(26.4) | 4(18.2) | 28(24.8) |  |  | 24(28.9) | 11(36.7) | 35(31.0) |  |
| Yes | 67(73.6) | 18(81.8) | 85(75.2) |  |  | 59(71.1) | 19(63.3) | 78(69.0) |  |
| Nerve invasion |  |  |  | 1.000 |  |  |  |  | 0.679 |
| No | 83(91.2) | 21(95.5) | 104(92.0) |  |  | 76(91.6） | 29(96.7) | 105(92.9) |  |
| Yes | 8(8.8) | 1(4.5) | 9(8.0) |  |  | 7(8.4) | 1(3.3) | 8(7.1) |  |
| Vascular invasion |  |  |  | 0.886 |  |  |  |  | 0.980 |
| No | 69(75.8) | 17(77.3) | 86(76.1) |  |  | 69(83.1) | 25(83.3) | 94(83.2) |  |
| Yes | 22(24.2) | 5(22.7) | 27(23.9) |  |  | 14(16.9) | 5(16.7) | 19(16.8) |  |
| Radiotherapy or chemotherapy |  |  |  | 0.595 |  |  |  |  | 0.725 |
| No | 85(93.4) | 22(100) | 107(94.7) |  |  | 74(89.2) | 28(93.3) | 102(90.3) |  |
| Yes | 6(5.3) | 0(0.0) | 6(5.3) |  |  | 9(10.8) | 2(6.7) | 11(9.7) |  |
| Tumor size |  |  |  | 0.426 |  |  |  |  | 0.165 |
| ≤3cm | 58(63.7) | 12(54.5) | 70(61.9) |  |  | 49959.0） | 22(73.3) | 71(62.8) |  |
| ＞3cm | 33(36.3) | 10(45.5) | 43(38.1) |  |  | 34(41.0) | 8(26.7) | 42(37.2) |  |

**Notes:** Variables are expressed as frequencies with percentages. χ2-test or Fisher exact test are used for variables. *P＜0.05

**Abbreviations:** PLR: Platelet-to-lymphocyte ratio; BMI: Body mass index.

**Table S2 Clinical and pathological characteristics of the low-grade group and high-grade group**

| Variable | Low-grade group | | | | High-grade group | | | |
| --- | --- | --- | --- | --- | --- | --- | --- | --- |
| PLR≤169.4 | PLR＞169.4 | Total | P | PLR≤169.4 | PLR＞169.4 | Total | P |
| Gender |  |  |  | 0.377 |  |  |  | 0.387 |
| Female | 20(74.1) | 7(25.9) | 27(39.7) |  | 63(73.3) | 23(26.7) | 86(54.4) |  |
| Male | 34(63.0) | 7(17.1) | 41(60.3) |  | 57(79.2) | 15(20.8） | 72(45.6) |  |
| Age |  |  |  | 0.108 |  |  |  | 0.798 |
| ＜70 years | 40(85.1) | 7(14.9) | 47(69.1) |  | 66(76.7) | 20(23.3) | 86(54.4) |  |
| ≥70 years | 14(66.7) | 7(33.3) | 21(30.9) |  | 54(75.0) | 18(25.0) | 72(45.6) |  |
| Pathologic T stage |  |  |  | 0.480 |  |  |  | 0.191 |
| pTa/pTis | 14(82.4) | 3(17.6) | 17(25.0) |  | 19(76.0) | 6(24.0) | 25(15.8) |  |
| pT1 | 15(88.2) | 2(11.8) | 17(25.0) |  | 20(71.4) | 8(28.6) | 28(17.7) |  |
| pT2 | 10(83.3) | 2(16.7） | 12(17.6) |  | 31(88.6) | 4(11.4) | 35(22.2) |  |
| pT3 | 14(70.0) | 6(30.0) | 20(29.4) |  | 42(75.0) | 14(25.0) | 56(35.4) |  |
| pT4 | 1(50.0) | 1(50.0) | 2(2.9) |  | 8(57.1) | 6(42.9) | 14(8.9) |  |
| Pathologic N stage |  |  |  | 0.105 |  |  |  | 0.397 |
| pN0 | 53(81.5) | 12(18.5) | 65(95.6) |  | 114(76.5) | 35(23.5) | 149(94.3) |  |
| pN1 | 1(50.0) | 1(50.0) | 2(2.9) |  | 2(100.0) | 0(0.0) | 2(1.3) |  |
| pN2 | 0(0.0) | 1(100.0) | 1(1.5) |  | 4(57.1) | 3(42.9) | 7(4.4) |  |
| Location |  |  |  | 0.641 |  |  |  | 0.232 |
| Left | 31(77.5) | 9(22.5) | 40(58.8) |  | 53(71.6) | 21(28.4) | 74(46.8) |  |
| Right | 23(82.1) | 5(17.9) | 28(41.2) |  | 67(79.8) | 17(20.2) | 84(53.2) |  |
| Hypertension |  |  |  | 0.902 |  |  |  | 0.644 |
| No | 28(80.0) | 7(20.0) | 35(51.5) |  | 58(74.4) | 20(25.6) | 78(49.4) |  |
| Yes | 26(78.8) | 7(21.2) | 33(48.5) |  | 62(77.5) | 18(22.5) | 80(50.6) |  |
| Diabetes |  |  |  | 0.377 |  |  |  | 0.595 |
| No | 48(81.4) | 11(18.6) | 59(86.8) |  | 83(74.8) | 28(25.8) | 111(70.3) |  |
| Yes | 6(66.7) | 3(33.3) | 9(13.2) |  | 37(78.7) | 10(21.3) | 47(29.7) |  |
| BMI |  |  |  | 0.818 |  |  |  | 0.004* |
| ＜24 kg/m2 | 29(78.4) | 8(21.6) | 37(54.4) |  | 47(65.3) | 25(34.7) | 72(45.6) |  |
| ≥24 kg/m2 | 25(80.6) | 6(19.4) | 31(45.6) |  | 73(84.9) | 13(15.1) | 86(54.4) |  |
| Uropathology |  |  |  | 0.828 |  |  |  | 0.420 |
| None | 32(78.0) | 9(22.0) | 41(60.3) |  | 58(71.6) | 23(28.4) | 81(51.3) |  |
| Existence | 6(75.0) | 2(25.0) | 8(11.8) |  | 26(81.3) | 6(18.8) | 32(20.3) |  |
| Heterocyst | 16(84.2) | 3(15.8) | 19(27.9) |  | 36(80.0) | 9(20.0) | 45(28.5) |  |
| Hydronephrosis |  |  |  | 0.745 |  |  |  | 0.682 |
| No | 39(78.0) | 11(22.0) | 50(73.5) |  | 81(75.0) | 27(25.0) | 108(68.4) |  |
| Yes | 15(83.3) | 3(16.7) | 18(26.5) |  | 39(78.0) | 11(22.0) | 50(31.6) |  |
| Tumor origin |  |  |  | 0.643 |  |  |  | 0.595 |
| Pelvis | 30(83.3) | 6(16.7) | 36(52.9) |  | 55(73.3) | 20(26.7) | 75(47.5) |  |
| Ureter | 17(73.9) | 6(26.1) | 23(33.8) |  | 53(76.8) | 16(23.2) | 69(43.7) |  |
| Both | 7(77.8) | 2(22.2) | 9(13.2) |  | 12(85.7) | 2(14.3) | 14(8.9) |  |
| Multifocality |  |  |  | 1.000 |  |  |  | 0.942 |
| Single | 36(80.0) | 9(20.0) | 45(66.2) |  | 75(75.8) | 24(24.2) | 99(62.7) |  |
| High | 18(78.3) | 5(21.7) | 23(33.8) |  | 45(76.3) | 14(23.7) | 59(37.3) |  |
| Invasive |  |  |  | 0.282 |  |  |  | 0.186 |
| No | 28(84.8) | 5(15.2) | 33(48.5) |  | 20(66.7) | 10(33.3) | 30(19.0) |  |
| Yes | 26(74.3) | 9(25.7) | 35(51.5) |  | 100(78.1) | 28(21.9) | 128(81.0) |  |
| Nerve invasion |  |  |  | 1.000 |  |  |  | 0.525 |
| No | 52(78.8) | 14(21.2) | 66(97.1) |  | 107(74.8) | 36(25.2) | 143(90.5) |  |
| Yes | 2(100.0) | 0(0.0) | 2(2.9) |  | 13(86.7) | 2(13.3) | 15(9.5) |  |
| Vascular invasion |  |  |  | 0.197 |  |  |  | 0.238 |
| No | 48(82.8) | 10(17.2) | 58(85.3) |  | 90(73.8) | 32(26.2) | 122(77.2) |  |
| Yes | 6(60.0) | 4(40.0) | 10(14.7) |  | 30(83.3) | 6(16.7) | 36(22.8) |  |
| Radiotherapy or chemotherapy |  |  |  | 0.108 |  |  |  | 0.674 |
| No | 44(75.9) | 14(24.1) | 58(85.3) |  | 115(76.2) | 36(23.8) | 151(95.6) |  |
| Yes | 10(100.0) | 0(0.0) | 10(14.7) |  | 5(71.4) | 2(28.6) | 7(4.4) |  |
| Tumor size |  |  |  | 0.886 |  |  |  | 0.508 |
| ≤3cm | 32(80.0) | 8(20.0) | 40(58.8) |  | 75(74.3) | 26(25.7) | 101(63.9) |  |
| ＞3cm | 22(78.6) | 6(21.4) | 28(41.2) |  | 45(78.9) | 12(21.1) | 57(36.1) |  |

**Notes:** Variables are expressed as frequencies with percentages. χ2-test or Fisher exact test are used for variables. *P＜0.05

**Abbreviations:** PLR: Platelet-to-lymphocyte ratio; BMI: Body mass index.

**Table S3 Univariate and multivariate Cox regression to explore the influence of** **intravesical recurrence-free survival for males**

| Variable | Univariate cox regression | | Multivariate cox regression | |
| --- | --- | --- | --- | --- |
| HR (95%CI) | P | HR (95%CI) | P |
| Age (x＜70 years vs ≥70 years) | 1.196(0.560-2.555) | 0.644 |  |  |
| Pathologic T stage (ref=pTa/pTis) |  |  |  |  |
| pT1 | 0.759(0.170-3.391) | 0.718 |  |  |
| pT2 | 1.586(0.425-5.923) | 0.493 |  |  |
| pT3 | 2.256(0.732-6.958) | 0.157 |  |  |
| pT4 | 2.638(0.586-11.868) | 0.206 |  |  |
| Pathologic N stage(ref=pN0) |  |  |  |  |
| pN1 | 29.326(3.263-263.590) | 0.003* | 19.561(1.861-205.620) | 0.013* |
| pN2 | 3.347(0.784-14.295) | 0.103 | 1.622(0.297-8.855) | 0.577 |
| Location (Left vs Right) | 0.824(0.386-1.760) | 0.617 |  |  |
| Hypertension (No vs Yes) | 0.883(0.417-1.867) | 0.744 |  |  |
| Diabetes (No vs Yes) | 1.198(0.509-2.821) | 0.679 |  |  |
| BMI(＜24 kg/m2vs ≥24 kg/m2) | 1.072(0.508-2.258) | 0.856 | 1.736(0.756-3.987) | 0.193 |
| Uropathology(ref=None) |  |  |  |  |
| Existence | 0.562(0.191-1.651) | 0.294 |  |  |
| Heterocyst | 0.511(0.191-1.371) | 0.182 |  |  |
| Hydronephrosis (No vs Yes) | 0.753(0.331-1.711) | 0.498 |  |  |
| Tumor origin(ref=Pelvis) |  |  |  |  |
| Ureter | 2.393(1.074-5.330) | 0.033* | 2.565(1.112-5.913) | 0.027* |
| Junction | 0.523(0.066-4.142) | 0.539 | 0.574(0.071-4.630) | 0.602 |
| Multifocality (Single vs Multiple) | 1.063(0.502-2.253) | 0.873 |  |  |
| Tumor grade (Low vs High) | 0.676(0.321-1.421) | 0.302 |  |  |
| Invasion (No vs Yes) | 1.778(0.675-4.683) | 0.244 |  |  |
| Nerve invasion (No vs Yes) | 1.879(0.563-6.267) | 0.305 |  |  |
| Vascular invasion (No vs Yes) | 1.510(0.662-3.447) | 0.327 |  |  |
| Radiotherapy or chemotherapy (No vs Yes) | 0.043(0.000-26.356) | 0.337 |  |  |
| Tumor size (≤3cm vs ＞3cm) | 2.241(1.063-4.724) | 0.034* | 2.573(1.156-5.726) | 0.021* |
| PLR (≤169.4 vs ＞169.4) | 2.799(1.289-6.076) | 0.009* | 2.546(1.034-6.269) | 0.042* |

**Notes:** Variables are expressed as HR (95% confidence interval). *P＜0.05

**Abbreviations:** PLR: Platelet-to-lymphocyte ratio; BMI: Body mass index.

**Table S4 Univariate and multivariate Cox regression to explore the influence of intravesical recurrence-free survival for females**

| Variable | Univariate cox regression | | Multivariate cox regression | |
| --- | --- | --- | --- | --- |
| HR (95%CI) | P | HR (95%CI) | P |
| Age (x＜70 years vs ≥70 years) | 1.448(0.558-3.775) | 0.446 |  |  |
| Pathologic T stage (ref=pTa/pTis) |  |  |  |  |
| pT1 | 1.179(0.011-2.876) | 0.224 |  |  |
| pT2 | 0.843(0.094-7.595) | 0.879 |  |  |
| pT3 | 0.646(0.072-5.810) | 0.697 |  |  |
| pT4 | 0.954(0.117-7.785) | 0.965 |  |  |
| Pathologic N stage (ref=pN0) |  |  |  |  |
| pN1 | 0.000(0.000) | 0.981 |  |  |
| pN2 | 4.390(0.992-19.416) | 0.051 |  |  |
| Location (Left vs Right) | 0.712(0.274-1.845) | 0.484 |  |  |
| Hypertension (No vs Yes) | 1.781(0.658-4.818) | 0.256 |  |  |
| Diabetes (No vs Yes) | 3.188(1.228-8.274) | 0.017* | 3.372(1.259-8.509) | 0.015* |
| BMI (＜24 kg/m2 vs ≥24 kg/m2) | 1.230(0.467-3.241) | 0.675 |  |  |
| Uropathology (ref=None) |  |  |  |  |
| Existence | 1.151(0.311-4.258) | 0.833 |  |  |
| Heterocyst | 0.981(0.328-2.932) | 0.973 |  |  |
| Hydronephrosis (No vs Yes) | 1.402(0.517-3.799) | 0.507 |  |  |
| Tumor origin(ref=Pelvis) |  |  |  |  |
| Ureter | 2.462(0.910-6.661) | 0.076 |  |  |
| Junction | 0.000(0.000) | 0.982 |  |  |
| Multifocality (Single vs Multiple) | 0.617(0.201-1.895) | 0.399 |  |  |
| Tumor grade (Low vs High) | 0.973(0.317-2.990) | 0.962 |  |  |
| Invasion (No vs Yes) | 1.148(0.404-3.261) | 0.796 |  |  |
| Nerve invasion (No vs Yes) | 2.321(0.525-10.266) | 0.267 |  |  |
| Vascular invasion (No vs Yes) | 0.785(0.179-3.448) | 0.749 |  |  |
| Radiotherapy or chemotherapy (No vs Yes) | 1.964(0.564-6.841) | 0.289 |  |  |
| Tumor size (≤3cm vs ＞3cm) | 0.737(0.260-2.095) | 0.567 |  |  |
| PLR (≤169.4 vs ＞169.4) | 1.820(0.673-4.926) | 0.238 | 1.919(0.708-5.204) | 0.200 |

**Notes:** Variables are expressed as HR (95% confidence interval). *P＜0.05

**Abbreviations:** PLR: Platelet-to-lymphocyte ratio; BMI: Body mass index.

**Table S5 Univariate and multivariate Cox regression to explore the influence of intravesical recurrence-free survival for low-grade tumor group**

| Variable | Univariate cox regression | | Multivariate cox regression | |
| --- | --- | --- | --- | --- |
| HR (95%CI) | P | HR (95%CI) | P |
| Gender (Female vs Male) | 2.089(0.680-6.415) | 0.198 |  |  |
| Age (x＜70 years vs ≥70 years) | 1.060(0.389-2.890) | 0.909 |  |  |
| Pathologic T stage (ref=pTa/pTis) |  |  |  |  |
| pT1 | 1.533(0.343-6.856) | 0.576 |  |  |
| pT2 | 1.769(0.396-7.911) | 0.455 |  |  |
| pT3 | 1.644(0.392-6.903) | 0.497 |  |  |
| pT4 | 3.715(0.382-36.161) | 0.258 |  |  |
| Pathologic N stage (ref=pN0) |  |  |  |  |
| pN1 | 5.500(0.693-43.631) | 0.107 | 21.727(1,895-249.077) | 0.013* |
| pN2 | 9.440(1.149-77.582) | 0.037* | 4.231(0.374-47.849) | 0.244 |
| Location (Left vs Right) | 0.614(0.216-1.743) | 0.359 |  |  |
| Hypertension (No vs Yes) | 0.796(0.303-2.091) | 0.643 |  |  |
| Diabetes (No vs Yes) | 0.971(0.220-4.287) | 0.969 |  |  |
| BMI (＜24 kg/m2 vs ≥24 kg/m2) | 1.367(0.523-3.568) | 0.524 |  |  |
| Uropathology (ref=None) |  |  |  |  |
| Existence | 0.805(0.181-3.571) | 0.775 |  |  |
| Heterocyst | 0.282(0.064-1.252) | 0.096 |  |  |
| Hydronephrosis (No vs Yes) | 1.108(0.390-3.146) | 0.848 |  |  |
| Tumor origin (ref=Pelvis) |  |  |  |  |
| Ureter | 3.721(1.288-10.754) | 0.015* | 4.713(1.445-15.372) | 0.010* |
| Junction | 0.911(0.106-7.804) | 0.932 | 1.403(0.153-12.895) | 0.765 |
| Multifocality (Single vs Multiple) | 1.045(0.386-2.830) | 0.930 |  |  |
| Invasive (No vs Yes) | 1.253(0.476-3.298) | 0.647 |  |  |
| Nerve invasion (No vs Yes) | 2.017(0.265-15.367) | 0.498 |  |  |
| Vascular invasion (No vs Yes) | 2.784(0.880-8.802) | 0.081 |  |  |
| Radiotherapy or chemotherapy (No vs Yes) | 0.734(0.167-3.221) | 0.682 |  |  |
| Tumor size (≤3cm vs ＞3cm) | 3.984(1.437-11.047) | 0.008* | 6.126(1.860-20.176) | 0.003* |
| PLR (≤169.4 vs ＞169.4) | 3.442(1.295-9.150) | 0.013* | 3.586(1.172-10.978) | 0.025* |

**Notes:** Variables are expressed as HR (95% confidence interval). *P＜0.05

**Abbreviations:** PLR: Platelet-to-lymphocyte ratio; BMI: Body mass index.

**Table S6 Univariate and multivariate Cox regression to explore the influence of intravesical recurrence-free survival for high-grade tumor group**

| Variable | Univariate cox regression | | Multivariate cox regression | |
| --- | --- | --- | --- | --- |
| HR (95%CI) | P | HR (95%CI) | P |
| Gender (Female vs Male) | 1.465(0.697-3.083) | 0.314 |  |  |
| Age (x＜70 years vs ≥70 years) | 1.365(0.650-2.867) | 0.411 |  |  |
| Pathologic T stage (ref=pTa/pTis) |  |  |  |  |
| pT1 | 1.604(0.268-9.603) | 0.605 | 1.587(0.264-9.543) | 0.614 |
| pT2 | 2.305(0.446-11.915) | 0.319 | 2.524(0.483-13.206) | 0.273 |
| pT3 | 4.631(1.054-20.353) | 0.042* | 4.357(0.983-19.305) | 0.053 |
| pT4 | 4.684(0.779-28.157) | 0.091 | 5.221(0.848-32.148) | 0.075 |
| Pathologic N stage (ref=pN0) |  |  |  |  |
| pN1 | 0.000(0.000) | 0.979 |  |  |
| pN2 | 3.214(0.968-10.674) | 0.057 |  |  |
| Location (Left vs Right) | 0.851(0.405-1.787) | 0.671 |  |  |
| Hypertension (No vs Yes) | 1.358(0.642-2.872) | 0.423 |  |  |
| Diabetes (No vs Yes) | 2.394(1.140-5.027) | 0.021* | 2.267(1.066-4.820) | 0.033* |
| BMI (＜24 kg/m2 vs ≥24 kg/m2) | 1.071(0.506-2.266) | 0.857 | 1.472(0.652-3.320) | 0.352 |
| Uropathology (ref=None) |  |  |  |  |
| Existence | 0.816(0.296-2.244) | 0.693 |  |  |
| Heterocyst | 0.977(0.414-2.306) | 0.957 |  |  |
| Hydronephrosis (No vs Yes) | 0.988(0.446-2.189) | 0.976 |  |  |
| Tumor origin (ref=Pelvis) |  |  |  |  |
| Ureter | 2.063(0.952-4.470) | 0.066 |  |  |
| Junction | 0.000(0.000) | 0.977 |  |  |
| Multifocality (Single vs Multiple) | 0.906(0.418-1.963) | 0.802 |  |  |
| Invasion (No vs Yes) | 2.396(0.722-7.947) | 0.153 |  |  |
| Nerve invasion (No vs Yes) | 2.117(0.730-6.141) | 0.167 |  |  |
| Vascular invasion (No vs Yes) | 1.016(0.411-2.511) | 0.972 |  |  |
| Radiotherapy or chemotherapy (No vs Yes) | 0.658(0.089-4.864) | 0.682 |  |  |
| Tumor size (≤3cm vs ＞3cm) | 0.854(0.386-1.888) | 0.697 |  |  |
| PLR (≤169.4 vs ＞169.4) | 1.768(0.797-3.921) | 0.161 | 1.990(0.845-4.683) | 0.115 |

**Notes:** Variables are expressed as HR (95% confidence interval). *P＜0.05

**Abbreviations:** PLR: Platelet-to-lymphocyte ratio; BMI: Body mass index.
